# Supplementary material for: Initial Health Assessments and HIV Screening under the Affordable Care Act
Source: PubMed Central journal article supplement (PMC4587809; doi:10.1371/journal.pone.0139361), 2015-09-29
Supplement: pone.0139361.s001.pdf [file pone.0139361.s001.pdf]

## Initial Health Data

| <b>Provider ID</b> | <b>Routine HIV Testing</b> | <b>HIV Test When Blood Draw</b> | <b>Knows HIV Testing Barriers Reduced</b> | <b>Conducts Sexual Health and Risk Assessment</b> | <b>Has Prompt in Electronic Medical Record</b> |
|--------------------|----------------------------|---------------------------------|-------------------------------------------|---------------------------------------------------|------------------------------------------------|
| 1                  | All/Most of the time       | Rarely/Never                    | Yes                                       | No                                                | No                                             |
| 2                  | All/Most of the time       | .                               | Yes                                       | Yes                                               | .                                              |
| 3                  | All/Most of the time       | All/Most of the time            | Yes                                       | Yes                                               | No                                             |
| 4                  | All/Most of the time       | Rarely/Never                    | Yes                                       | Yes                                               | No                                             |
| 5                  | All/Most of the time       | Rarely/Never                    | Yes                                       | Yes                                               | No                                             |
| 6                  | All/Most of the time       | All/Most of the time            | Yes                                       | Yes                                               | No                                             |
| 7                  | Rarely/Never               | Rarely/Never                    | No                                        | No                                                | No                                             |
| 8                  | Sometimes                  | Rarely/Never                    | No                                        | Yes                                               | No                                             |
| 9                  | All/Most of the time       | .                               | Yes                                       | Yes                                               | No                                             |
| 10                 | Sometimes                  | All/Most of the time            | No                                        | .                                                 | .                                              |
| 11                 | All/Most of the time       | Rarely/Never                    | Yes                                       | Yes                                               | .                                              |
| 12                 | All/Most of the time       | Sometimes                       | No                                        | Yes                                               | Yes                                            |
| 13                 | Rarely/Never               | Rarely/Never                    | Yes                                       | Yes                                               | No                                             |
| 14                 | All/Most of the time       | All/Most of the time            | Yes                                       | Yes                                               | No                                             |
| 15                 | All/Most of the time       | Rarely/Never                    | Yes                                       | Yes                                               | No                                             |
| 16                 | Sometimes                  | Sometimes                       | No                                        | No                                                | Yes                                            |
| 17                 | All/Most of the time       | Rarely/Never                    | No                                        | Yes                                               | Yes                                            |
| 18                 | Sometimes                  | Rarely/Never                    | No                                        | Yes                                               | Yes                                            |
| 19                 | Rarely/Never               | Rarely/Never                    | Yes                                       | Yes                                               | No                                             |
| 20                 | All/Most of the time       | Rarely/Never                    | Yes                                       | Yes                                               | Yes                                            |
| 21                 | Sometimes                  | Rarely/Never                    | No                                        | Yes                                               | No                                             |
| 22                 | Sometimes                  | Rarely/Never                    | Yes                                       | Yes                                               | No                                             |
| 23                 | All/Most of the time       | Rarely/Never                    | Yes                                       | Yes                                               | No                                             |
| 24                 | All/Most of the time       | Sometimes                       | Yes                                       | Yes                                               | No                                             |
| 25                 | Sometimes                  | Rarely/Never                    | No                                        | No                                                | No                                             |
| 26                 | Rarely/Never               | Rarely/Never                    | No                                        | No                                                | No                                             |
| 27                 | Sometimes                  | Rarely/Never                    | Yes                                       | Yes                                               | No                                             |
| 28                 | Rarely/Never               | Rarely/Never                    | No                                        | No                                                | No                                             |
| 29                 | Sometimes                  | Rarely/Never                    | No                                        | .                                                 | No                                             |
| 30                 | Rarely/Never               | Rarely/Never                    | Yes                                       | Yes                                               | No                                             |
| 31                 | All/Most of the time       | Sometimes                       | Yes                                       | Yes                                               | Yes                                            |
| 32                 | Sometimes                  | Rarely/Never                    | Yes                                       | Yes                                               | Yes                                            |
| 33                 | Rarely/Never               | Rarely/Never                    | No                                        | Yes                                               | No                                             |
| 34                 | Rarely/Never               | Rarely/Never                    | No                                        | No                                                | No                                             |
| 35                 | Sometimes                  | Rarely/Never                    | Yes                                       | Yes                                               | No                                             |
| 36                 | Sometimes                  | Rarely/Never                    | No                                        | No                                                | No                                             |
| 37                 | Rarely/Never               | Rarely/Never                    | No                                        | No                                                | No                                             |

## Initial Health Data

| <b>Provider ID</b> | <b>Routine HIV Testing</b> | <b>HIV Test When Blood Draw</b> | <b>Knows HIV Testing Barriers Reduced</b> | <b>Conducts Sexual Health and Risk Assessment</b> | <b>Has Prompt in Electronic Medical Record</b> |
|--------------------|----------------------------|---------------------------------|-------------------------------------------|---------------------------------------------------|------------------------------------------------|
| 38                 | All/Most of the time       | All/Most of the time            | Yes                                       | Yes                                               | No                                             |
| 39                 | Sometimes                  | Sometimes                       | No                                        | Yes                                               | No                                             |
| 40                 | Rarely/Never               | Rarely/Never                    | No                                        | No                                                | Yes                                            |
| 41                 | All/Most of the time       | Rarely/Never                    | Yes                                       | No                                                | Yes                                            |
| 42                 | Rarely/Never               | Rarely/Never                    | No                                        | No                                                | No                                             |
| 43                 | Rarely/Never               | Rarely/Never                    | Yes                                       | Yes                                               | Yes                                            |
| 44                 | Sometimes                  | Rarely/Never                    | No                                        | Yes                                               | Yes                                            |
| 45                 | Sometimes                  | Rarely/Never                    | Yes                                       | Yes                                               | No                                             |
| 46                 | Sometimes                  | Rarely/Never                    | Yes                                       | No                                                | No                                             |
| 47                 | Sometimes                  | Rarely/Never                    | No                                        | Yes                                               | No                                             |
| 48                 | Sometimes                  | Sometimes                       | Yes                                       | Yes                                               | No                                             |
| 49                 | All/Most of the time       | Rarely/Never                    | Yes                                       | Yes                                               | Yes                                            |
| 50                 | Rarely/Never               | Rarely/Never                    | No                                        | Yes                                               | No                                             |
| 51                 | Sometimes                  | Rarely/Never                    | No                                        | Yes                                               | No                                             |
| 52                 | Rarely/Never               | .                               | No                                        | .                                                 | No                                             |
| 53                 | Rarely/Never               | Rarely/Never                    | Yes                                       | Yes                                               | No                                             |
| 54                 | Rarely/Never               | Rarely/Never                    | No                                        | Yes                                               | No                                             |
| 55                 | Rarely/Never               | Rarely/Never                    | No                                        | No                                                | No                                             |
| 56                 | Rarely/Never               | Rarely/Never                    | Yes                                       | Yes                                               | No                                             |
| 57                 | Rarely/Never               | Sometimes                       | Yes                                       | No                                                | No                                             |
| 58                 | Rarely/Never               | Rarely/Never                    | No                                        | Yes                                               | No                                             |
| 59                 | Sometimes                  | Rarely/Never                    | Yes                                       | Yes                                               | Yes                                            |
| 60                 | Sometimes                  | Rarely/Never                    | No                                        | No                                                | Yes                                            |
